# Supplementary material for: Gate-controlled rectification and broadband photodetection in a P–N diode based on TMDC heterostructures
Source: Royal Society of Chemistry journal article supplement (doi:10.1039/d3ma00786c), 2023-12-14
Supplement: d3ma00786c1.pdf [file d3ma00786c1.pdf]

## Gate-controlled Rectification and Broadband Photodetection in a P-N Diode based on TMDCs Heterostructure

Ehsan Elahi<sup>1†\*</sup>, Sobia Nisar<sup>†2</sup>, Muhammad Rabeel<sup>2,3</sup>, Malik Abdul Rehman<sup>4</sup>, Mohamed Ouladsamne<sup>5</sup>,  
Muhammad Irfan<sup>6</sup>, Muhammad Abubakr<sup>2,7</sup>, Jamal Aziz<sup>8</sup>, Muhammad Asim<sup>1</sup>, Ghulam Dastgeer<sup>1\*</sup>

<sup>1</sup>*Department of Physics & Astronomy, Sejong University, 209 Neungdong-ro, Gwangjin-Gu, Seoul, 05006 South Korea*

<sup>2</sup>*Department of Electrical Engineering, Sejong University, 209 Neungdong-ro, Gwangjin-gu, Seoul, 05006, South Korea*

<sup>3</sup>*Department of Convergence Engineering for Intelligent Drone, Sejong University, Seoul, 05006, South Korea*

<sup>4</sup>*Department of Chemical Engineering, New Uzbekistan University, Tashkent, 100007, Uzbekistan*

<sup>5</sup>*Department of Chemistry, College of Science, King Saud University, Riyadh, 11451, Saudi Arabia*

<sup>6</sup>*Department of Electrical Engineering, University of Engineering and Technology, Faisalabad, Pakistan*

<sup>7</sup>*Graduate School of Optical Engineering, Sejong University, Seoul, 05006, South Korea.*

<sup>8</sup>*School of Electrical, Information and Media Engineering, Bergische Universität Wuppertal, Lise-Meitner-Straße 13, 42119 Wuppertal, Germany*

\*Corresponding author e-mail: (Ehsan Elahi) [Ehsanelahi@sju.ac.kr](mailto:Ehsanelahi@sju.ac.kr)

(Ghulam Dastgeer) [gdastgeer@sejong.ac.kr](mailto:gdastgeer@sejong.ac.kr)

†: Ehsan Elahi and Sobia Nisar shared the 1<sup>st</sup> authorship equally

## AFM of WSe<sub>2</sub> and SnS<sub>2</sub>

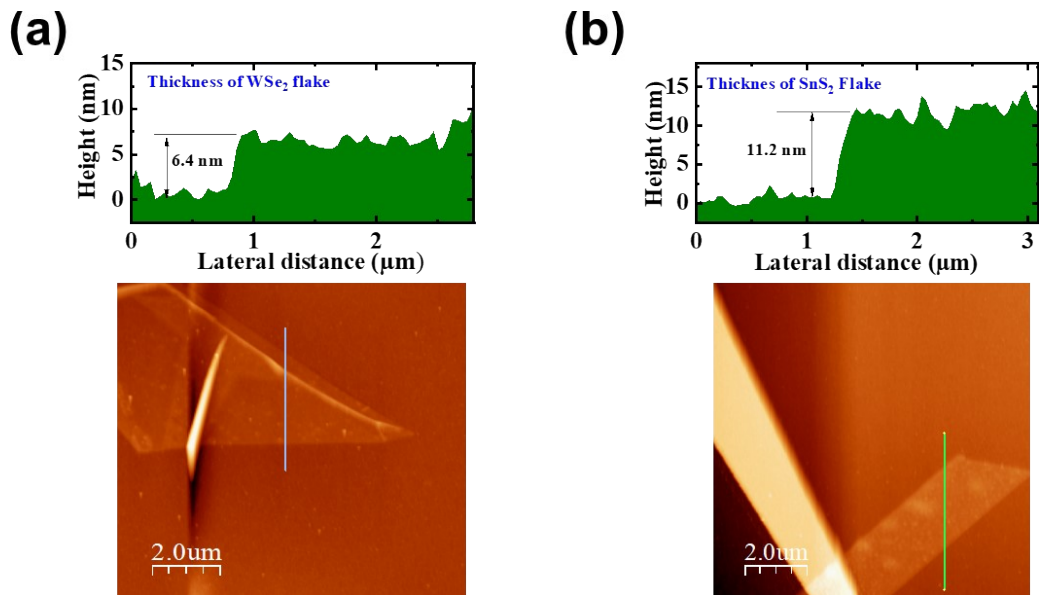

**Figure S1:** (a) AFM height profile and image of an individual flake of WSe<sub>2</sub>. (b) AFM height profile and image of an individual flake of SnS<sub>2</sub>.

## Raman Spectra of WSe<sub>2</sub> and SnS<sub>2</sub>

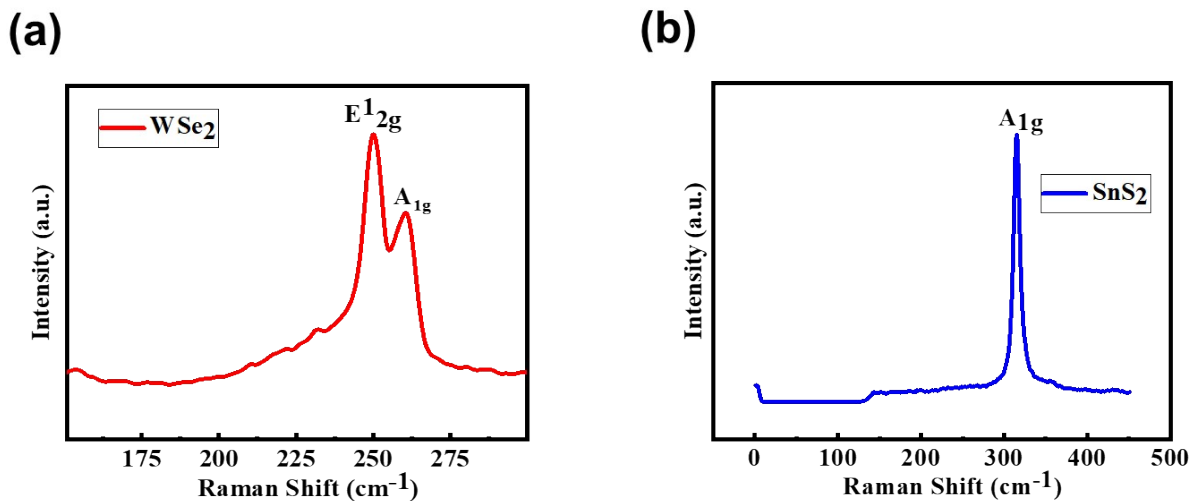

**Figure S2:** (a) Raman spectra of SnS<sub>2</sub> and (b) WSe<sub>2</sub>.

### Ideality factor calculation

The ideality factor was calculated for the forward-biased zone by fitting the logarithmic I-V characteristics to the Shockley diode equation.

$$I_D = I_S \left[ \exp\left(\frac{qV}{nk_B T}\right) - 1 \right]$$

where  $I_D$  represents the diode current,  $I_S$  represents the reverse bias saturation current,  $V$  denotes the applied voltage,  $\eta$  symbolizes an ideality factor,  $T$  signifies temperature,  $q$  symbolizes electronic charge, and  $k_B$  indicates Boltzmann's constant. For applied voltages larger than  $k_B T$  (e.g.,  $> 0.1$  V), the term "-1" in the preceding equation can be ignored.

$$\ln(I_D) = \ln(I_S) + \left(\frac{q}{nK_B T}\right)V$$

$$\eta = \frac{1}{\text{Slope}} \left( \frac{q}{K_B T} \right)$$

$$\eta = \frac{1}{\text{Slope}} \left( \frac{1.6 \times 10^{-16} \text{C}}{1.38 \times 10^{-23} \text{JK}^{-1} \times 300 \text{K}} \right)$$

$$\text{Slope} = 25.77$$

$$\eta = \frac{38.6}{27.30} = 1.41$$

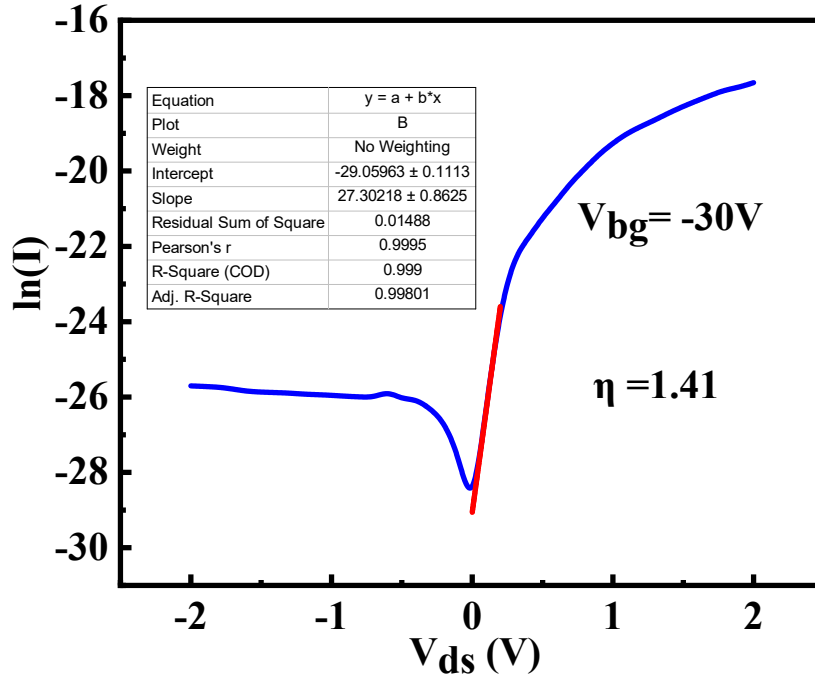

**Figure S3:** Logarithmic ( $I_{ds}$ - $V_{ds}$ ) curve to find the slope, the inset shows the slope.

### Rise and Decay time

The rising and decay times were observed by fitting the data obtained through photocurrent. The fitting of rise and decay time is represented in **Figure S4**.

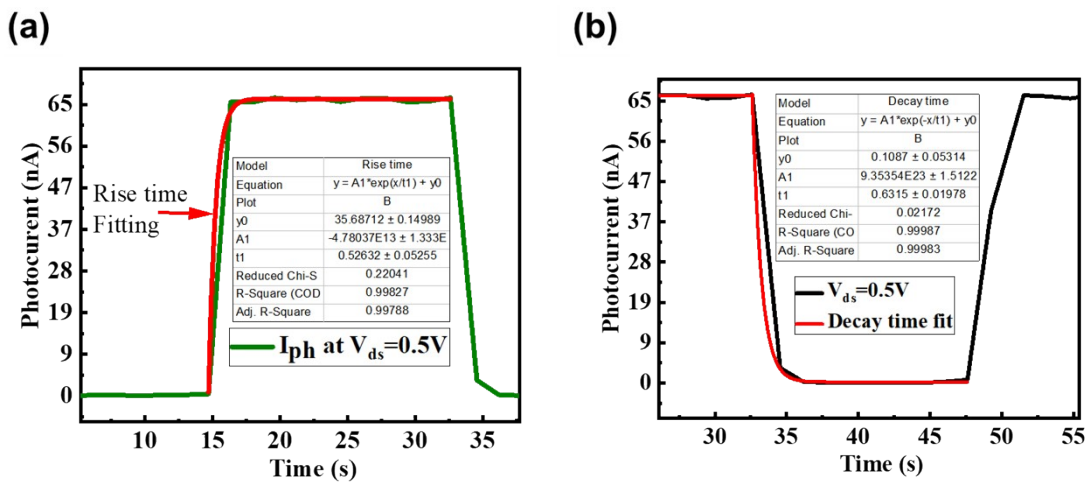

**Figure S4:** (a) The rise time for the photocurrent at  $V_{ds}=0.5V$ . (b) The fall time at  $V_{ds}=0.5V$ .

## Logarithmic scale for Photocurrent

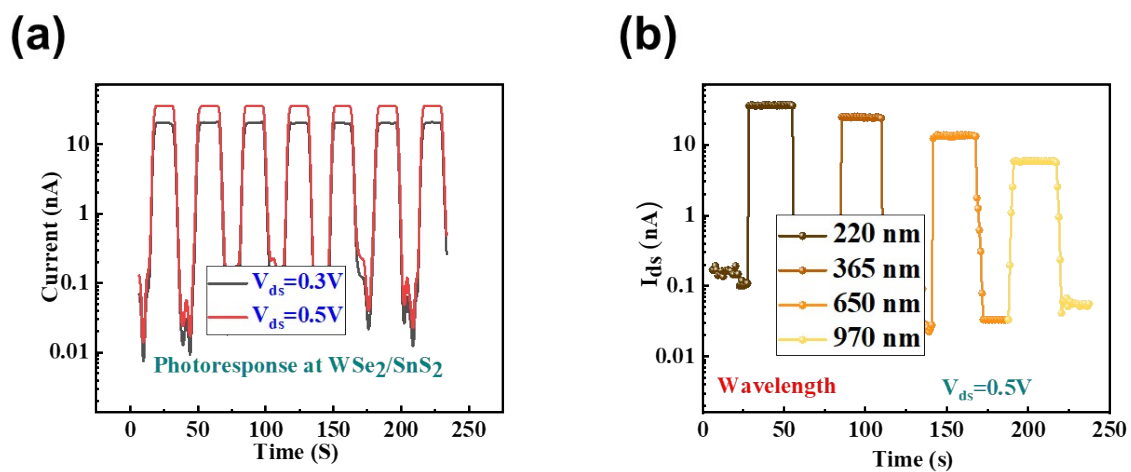

**Figure S5:** (a) The logarithmic scale of photocurrent at different  $V_{ds}$ . (b) The logarithmic scale of Photocurrent at different wavelengths.
